# Supplementary material for: Synthesis of GO supported Fe2O3–TiO2 nanocomposites for enhanced visible-light photocatalytic applications
Source: Royal Society of Chemistry journal article supplement (doi:10.1039/c5dt02983j), 2015-01-01
Supplement: c5dt02983j1.pdf [file c5dt02983j1.pdf]

Supporting file S1

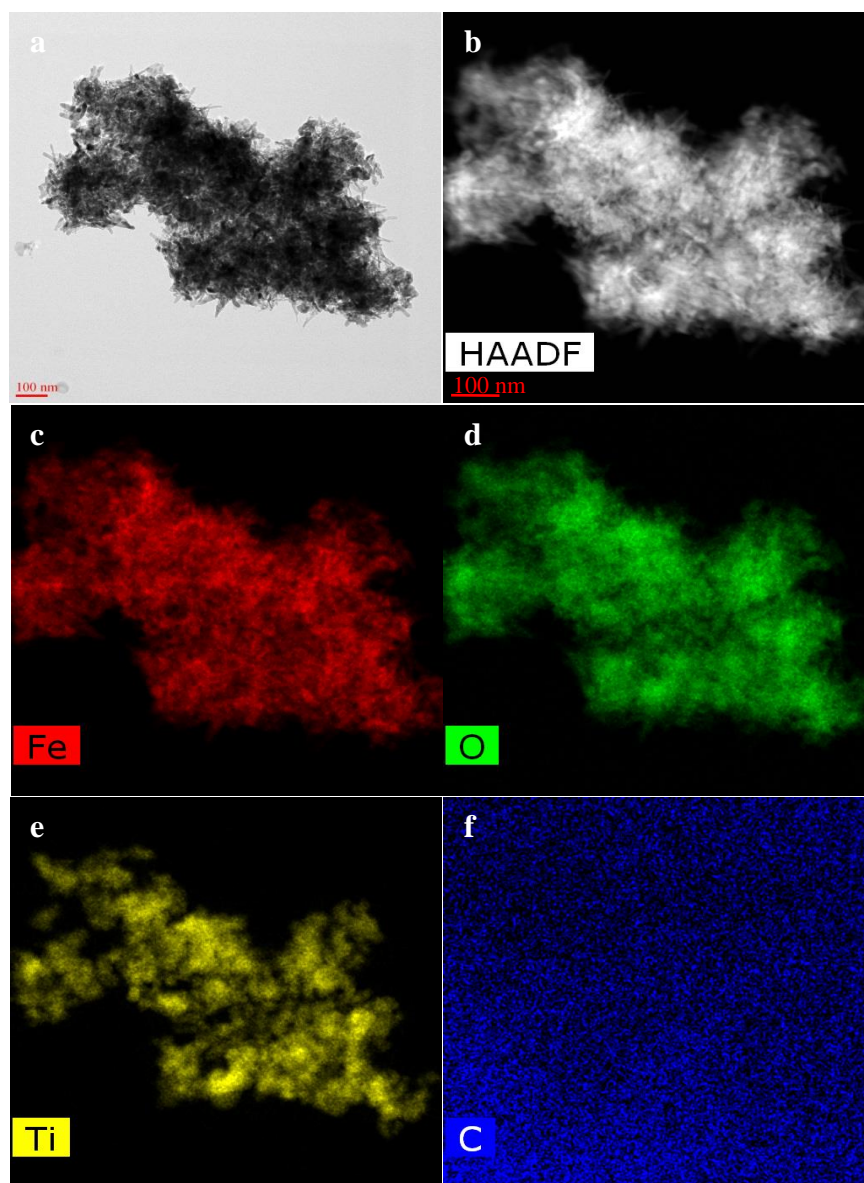

S1 TEM images of (a) ternary composite ( $\text{Fe}_2\text{O}_3\text{-TiO}_2/\text{GO}(1.0\ \%)$ ) from different region, (b) corresponding HAADF STEM image, and the spatially resolved Fe (c), O (d), Ti (e), and C (f) elemental maps of ternary composite

Supporting file S2

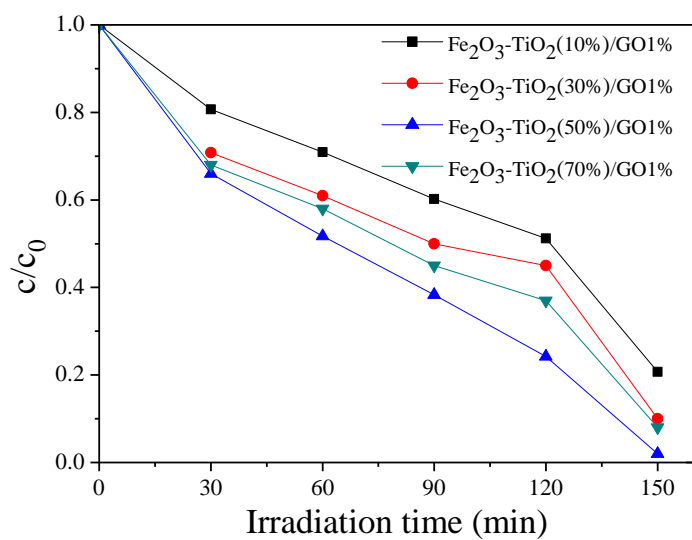

S2 PCD of MB using the prepared photocatalysts after 150 min of visible light illumination
